# Supplementary material for: Systematic review of the application of the plan–do–study–act method to improve quality in healthcare
Source: PubMed Central journal article supplement — BMJ Qual Saf. 2013 Aug 23;23(4):290–8. doi: 10.1136/bmjqs-2013-001862 (PMC3963536; doi:10.1136/bmjqs-2013-001862), 2013-08-23
Supplement: bmjqs-2013-001862-s1.pdf [file bmjqs-2013-001862-s1.pdf]

### Appendix A: Studies identified in search that used PDSA method

All 73 studies identified in review.

| First author | Year of publication | Country | Title                                                                                                                                    | Length of study (months) | Cycle(s) referred to as PDSAs or PDCA's? | Model for Improvement or FOCUS supporting model? | How thoroughly were PDSA methods described?* |
|--------------|---------------------|---------|------------------------------------------------------------------------------------------------------------------------------------------|--------------------------|------------------------------------------|--------------------------------------------------|----------------------------------------------|
| Bader(1)     | 2002                | USA     | Using a FOCUS-PDCA quality improvement model for applying the severe traumatic brain injury guidelines to practice: process and outcomes | 36                       | PDCA                                     | FOCUS                                            | 4                                            |
| Baker(2)     | 2002                | USA     | Successful performance improvement                                                                                                       | unclear                  | PDCA                                     | none                                             | 2                                            |
| Barry(3)     | 2006                | UK      | Small is beautiful                                                                                                                       | 15                       | PDSA                                     | none                                             | 1                                            |
| Beger(4)     | 1999                | USA     | Self-Administered Medication Packet for Patients Experiencing a Vaginal Birth                                                            | 1                        | PDCA                                     | FOCUS                                            | 4                                            |
| Bittle(5)    | 2007                | USA     | Registration-associated patient misidentification in an academic medical center: causes and corrections                                  | 48                       | PDSA                                     | none                                             | 3                                            |
| Boesch(6)    | 2012                | USA     | Prevention of Tracheostomy-related Pressure Ulcers in Children                                                                           | 30                       | PDSA                                     | none                                             | 1                                            |
| Boyd(7)      | 2011                | UK      | Peripheral intravenous catheters: the road to quality improvement and safer patient care                                                 | 6                        | PDSA                                     | Mfi                                              | 4                                            |
| Brown(8)     | 2006                | UK      | Redesigning patient services                                                                                                             | 2                        | PDSA                                     | Mfi                                              | 4                                            |
| Buckley(9)   | 2010                | USA     | Linking residency training effectiveness to clinical outcomes: a quality improvement approach                                            | 48                       | PDSA                                     | none                                             | 4                                            |
| Buhr(10)     | 2006                | USA     | Quality improvement initiative for chronic pain assessment and management in the nursing home: a pilot study                             | 16                       | PDSA                                     | none                                             | 4                                            |

|                |      |        |                                                                                                                                             |         |      |               |   |
|----------------|------|--------|---------------------------------------------------------------------------------------------------------------------------------------------|---------|------|---------------|---|
| Campbell(11)   | 2008 | Canada | Bridging the gap between primary and secondary care: use of a clinical pathway for the investigation and management of deep vein thrombosis | unclear | PDSA | none          | 1 |
| Caswell(12)    | 1996 | USA    | Improving the management of anemia in hemodialysis patients by implementing the continuous quality improvement program                      | 12      | PDCA | FOCUS         | 4 |
| Chen(13)       | 2006 | China  |                                                                                                                                             | 20      | PDCA | none          | 4 |
| Christie(14)   | 2009 | UK     | Using a communication framework at handover to boost patient outcomes                                                                       | 36      | PDSA | Mfl           | 4 |
| Curran(15)     | 2012 | UK     | Using a PDSA cycle of improvement to increase preparedness for, and management of, norovirus in NHS Scotland                                | 12      | PDSA | none          | 4 |
| Dobrzanska(16) | 2007 | UK     | Piloting stroke rehabilitation in a community hospital                                                                                      | unclear | PDSA | none          | 1 |
| Dover(17)      | 2012 | UK     | Caring for patients in the right place at the right time                                                                                    | 12      | PDSA | Mfl           | 3 |
| Dunn(18)       | 2011 | USA    | Developing a nursing model of care? Try focus groups                                                                                        | 2       | PDSA | none          | 4 |
| Eckhart(19)    | 1996 | USA    | Improved Coumadin therapy using a continuous quality improvement process                                                                    | 24      | PDCA | FOCUS         | 4 |
| Eisenberg(20)  | 2002 | USA    | Intravascular therapy process improvement in a multihospital system: don't get stuck with substandard care                                  | 18      | PDCA | none          | 4 |
| Esmail(21)     | 2004 | Canada | Quality improvement in the ICU. A Canadian perspective                                                                                      | unclear | PDCA | FOCUS and Mfl | 1 |
| Feehery(22)    | 2003 | USA    | Flushing 101: using a FOCUS-PDCA quality improvement model to reduce catheter occlusions with standardized protocols                        | unclear | PDCA | FOCUS         | 1 |
| Fernandes(23)  | 2009 | Dubai  | Using evidence to reduce the rate of episiotomy in a Dubai hospital                                                                         | 13      | PDCA | FOCUS         | 4 |

|                  |      |           |                                                                                                                                    |         |      |       |   |
|------------------|------|-----------|------------------------------------------------------------------------------------------------------------------------------------|---------|------|-------|---|
| Flynt(24)        | 2002 | USA       | Using OASIS Data to Improve Skin Care                                                                                              | unclear | PDCA | FOCUS | 4 |
| Gillaspie(25)    | 2010 | USA       | Better pain management after total joint replacement surgery: a quality improvement                                                | 0.033   | PDSA | none  | 3 |
| Gordon(26)       | 2000 | USA       | A quality improvement approach to reducing use of meperidine                                                                       | 60      | PDCA | none  | 4 |
| Gordon(27)       | 2008 | USA       | Improving reassessment and documentation of pain management                                                                        | 24      | PDCA | none  | 4 |
| Gray(28)         | 2007 | UK        | Developing the public health role of a front line clinical service: integrating stop smoking advice into routine podiatry services | 6       | PDSA | none  | 2 |
| Hallett(29)      | 2012 | UK        | How to address the physical needs of clients in a mental health setting                                                            | 3       | PDSA | Mfi   | 4 |
| Hoskins(30)      | 2002 | USA       | Quality improvement in patient distribution at a major university student health center                                            | 6       | PDCA | FOCUS | 4 |
| Isouard(31)      | 1999 | Australia | Improved turnaround time of laboratory test results using a FOCUS PDCA approach                                                    | 12      | PDCA | FOCUS | 4 |
| Johnson(32)      | 2009 | USA       | Implementation of a diabetes clinic-in-a-clinic project in a family practice setting: using the plan, do, study, act model         | 3       | PDSA | none  | 3 |
| Koll(33)         | 2008 | USA       | The CLABs Collaborative: A Regionwide Effort to Improve the Quality of Care in Hospitals                                           | unclear | PDSA | none  | 1 |
| Leone(34)        | 2009 | USA       | Implementing a pain management program in a long-term care facility using a quality improvement approach                           | 2       | PDSA | none  | 4 |
| Lynch-Jordan(35) | 2010 | USA       | Applying quality improvement methods to implement a measurement system for chronic pain-related disability                         | 6       | PDSA | none  | 3 |
| Manfredi(36)     | 2003 | Brazil    | A model for improving quality in                                                                                                   | 6       | PDCA | none  | 4 |

|                         |      |             |                                                                                                                                                                            |         |      |       |   |
|-------------------------|------|-------------|----------------------------------------------------------------------------------------------------------------------------------------------------------------------------|---------|------|-------|---|
| Marang-van de Mheen(37) | 2006 | Netherlands | nephrology settings<br>Adverse outcomes in surgical patients: implementation of a nationwide reporting system                                                              | unclear | PDSA | none  | 1 |
| Marcellus(38)           | 2012 | USA         | Quality Improvement for Neonatal Nurses, Part II: Using a PDSA Quality Improvement Cycle Approach to Implement an Oral Feeding Progression Guideline for Premature Infants | 32      | PDSA | none  | 3 |
| McPharlin(39)           | 1993 | USA         | FOCUS-PDCA(TM): A quality improvement tool to improve efficiency in the vascular laboratory                                                                                | 14      | PDCA | FOCUS | 4 |
| Meehan(40)              | 1993 | USA         | Improving blood glucose monitoring in a hospital setting using the PDCA approach                                                                                           | unclear | PDCA | none  | 4 |
| Miano(41)               | 1998 | USA         | Implementation of the IV push method of antibiotic administration using the FOCUS/PDCA approach                                                                            | 6       | PDCA | FOCUS | 4 |
| Miller(42)              | 1994 | USA         | Quality management series: Quality improvement in the cutaneous micrographic surgery laboratory                                                                            | 12      | PDCA | FOCUS | 4 |
| Moran(43)               | 2009 | Ireland     | Improving palliative care                                                                                                                                                  | unclear | PDSA | none  | 4 |
| Nakayama(44)            | 2010 | USA         | Using a Plan-Do-Study-Act cycle to introduce a new OR service line                                                                                                         | 1 year  | PDSA | Mfl   | 2 |
| Nayeri(45)              | 2011 | Iran        | An investigation into the effects of quality improvement method on patients' satisfaction: A semi experimental research in Iran                                            | unclear | PDCA | FOCUS | 4 |
| New(46)                 | 1997 | USA         | Quality improvement in the ambulatory surgical setting                                                                                                                     | 2       | PDCA | FOCUS | 4 |
| Nicotra(47)             | 1996 | USA         | Process improvement plan for the reduction of nosocomial pneumonia in patients on ventilators                                                                              | unclear | PDCA | FOCUS | 1 |
| Olenginski(48)          | 2006 | USA         | Development and Evaluation of a                                                                                                                                            | unclear | PDSA | none  | 2 |

|               |      |           |                                                                                                                                                                                                                 |         |      |       |   |
|---------------|------|-----------|-----------------------------------------------------------------------------------------------------------------------------------------------------------------------------------------------------------------|---------|------|-------|---|
| Oyler(49)     | 2011 | USA       | Vertebral Fracture Assessment Program Using IVA and Its Integration With Mobile DXA Teaching internal medicine residents to sustain their improvement through the quality assessment and improvement curriculum | 36      | PDSA | none  | 2 |
| Pace(50)      | 1997 | USA       | Clinical research. Performance model anchors successful nutrition support protocol                                                                                                                              | 48      | PDCA | FOCUS | 4 |
| Porter(51)    | 2009 | Australia | Improving GP diabetes management. A PDSA audit cycle in Western Australia                                                                                                                                       | unclear | PDSA | none  | 1 |
| Pronovost(52) | 2000 | USA       | Using online and offline change models to improve ICU access and revenues                                                                                                                                       | 24      | PDSA | none  | 4 |
| Provance(53)  | 1994 | USA       | Quality Improvement and Public Health - Tetanus Immunization in the Emergency Department                                                                                                                        | 12      | PDCA | FOCUS | 2 |
| Reid(54)      | 2005 | UK        | Does client self-booking reduce 'did not attends' (DNAs) in a counselling service?                                                                                                                              | 1       | PDSA | none  | 4 |
| Reid(55)      | 2005 | UK        | Improving referral information in community mental health                                                                                                                                                       | unclear | PDSA | none  | 4 |
| Robarts(56)   | 2008 | Canada    | A framework for the development and implementation of an advanced practice role for physiotherapists that improves access and quality of care for patients                                                      | unclear | PDSA | none  | 3 |
| Sanchez(57)   | 2009 | USA       | Implementation of a diabetic visual foot assessment in a primary care setting                                                                                                                                   | 0.5     | PDCA | none  | 4 |
| Saxena(58)    | 2004 | USA       | A comprehensive assessment program to improve blood-administering practices using the FOCUS-PDCA model                                                                                                          | 51      | PDCA | FOCUS | 1 |

|              |      |                 |                                                                                                                                                                                              |    |      |      |   |
|--------------|------|-----------------|----------------------------------------------------------------------------------------------------------------------------------------------------------------------------------------------|----|------|------|---|
| Simon(59)    | 1997 | USA             | Improving the processes of care and outcomes in obstetrics/gynecology                                                                                                                        | 30 | PDCA | none | 4 |
| Sorokin(60)  | 2006 | USA             | Enhancing patient safety during feeding-tube insertion: a review of more than 2,000 insertions                                                                                               | 20 | PDSA | none | 4 |
| Stadt(61)    | 2005 | USA             | Best practices that Improved Patient Outcomes and Agency Operational Performance                                                                                                             | 48 | PDSA | none | 4 |
| Stevens(62)  | 2010 | USA             | A Multi-Institutional Quality Improvement Initiative to Transform Education for Chronic Illness Care in Resident Continuity Practices                                                        | 36 | PDSA | none | 1 |
| Sumrall(63)  | 2011 | USA             | Achieving appropriate prophylactic antibiotic administration while simultaneously implementing an automated anesthesia record                                                                | 18 | PDSA | none | 4 |
| Tea(64)      | 2008 | USA             | Proactive patient rounding to increase customer service and satisfaction on an orthopaedic unit                                                                                              |    | PDCA | none | 1 |
| Thakkar(65)  | 2011 | UK              | A quality improvement programme to increase compliance with an anti-infective prescribing policy                                                                                             | 12 | PDSA | none | 1 |
| Tomolo(66)   | 2009 | USA             | A case study of translating ACGME practice-based learning and improvement requirements into reality: systems quality improvement projects as the key component to a comprehensive curriculum | 22 | PDSA | Mfl  | 2 |
| Torkki(67)   | 2006 | Finland         | Managing urgent surgery as a process: Case study of a trauma center                                                                                                                          | 12 | PDCA | none | 4 |
| Van Tiel(68) | 2006 | The Netherlands | Plan-do-study-act cycles as an instrument for improvement of compliance with infection control measures in care of patients after                                                            | 15 | PDSA | none | 2 |

|                   |      |           |                                                                                                                                         |         |      |       |   |
|-------------------|------|-----------|-----------------------------------------------------------------------------------------------------------------------------------------|---------|------|-------|---|
| Varkey(69)        | 2009 | USA       | cardiothoracic surgery<br>Using quality-improvement techniques to enhance patient education and counselling of diagnosis and management | 0.75    | PDSA | none  | 3 |
| Wheatland(70)     | 2006 | Australia | Initiating a PDSA cycle: improving management of diabetes in rural WA                                                                   | unclear | PDSA | none  | 4 |
| Wojciechowski(71) | 2007 | USA       | A case review: designing a new patient education system                                                                                 | 48      | PDSA | none  | 4 |
| Wolfenden(72)     | 2010 | UK        | Track and trigger system for use in community hospitals                                                                                 | unclear | PDSA | none  | 1 |
| Zack(73)          | 2008 | USA       | Zeroing in on zero tolerance for central line-associated bacteremia                                                                     | unclear | PDCA | FOCUS | 1 |

\*1= No detail of cycles reported, 2 = Themes of cycles provided (but no additional details), 3 = Details of individual cycles, but not of stages

within cycles provided, 4 = Details of cycles including separate information regarding stages of cycles provided

1. Bader MK, Palmer S, Stalcup C, Shaver T. Using a FOCUS-PDCA Quality Improvement Model for Applying the Severe Traumatic Brain Injury Guidelines to Practice: Process and Outcomes. *Worldviews on Evidence-based Nursing presents the archives of Online Journal of Knowledge Synthesis for Nursing*. 2002;E9(1):97-100.
2. Baker DL. Successful performance improvement. *AORN journal*. 2002;75(4):825.
3. Barry S, Hughes G, Lawton-Smith S. Small is beautiful. *Mental health today (Brighton, England)*. 2006:30.
4. Beger D, Messenger F, Roth S. Self-Administered Medication Packet for Patients Experiencing a Vaginal Birth. *Journal of Nursing Care Quality*. 1999;13(4):47-59.
5. Bittle MJ, Charache P, Wassilchak DM. Performance Improvement: Registration-Associated Patient Misidentification in an Academic Medical Center: Causes and Corrections. *Joint Commission Journal on Quality and Patient Safety*. 2007;33(1):25-33.
6. Boesch RP, Myers C, Garrett T, Nie AM, Thomas N, Chima A, et al. Prevention of Tracheostomy-related Pressure Ulcers in Children. *Pediatrics*. 2012;129(3):e792-e7.
7. Boyd S, Aggarwal I, Davey P, Logan M, Nathwani D. Peripheral intravenous catheters: the road to quality improvement and safer patient care. *Journal of Hospital Infection*. [doi: 10.1016/j.jhin.2010.09.011]. 2011;77(1):37-41.
8. Brown A. Redesigning patient services. *Nursing Management - UK*. 2006;13(2):26-30.

9. Buckley JD, Joyce B, Garcia AJ, Jordan J, Scher E. Linking Residency Training Effectiveness to Clinical Outcomes: A Quality Improvement Approach. *Joint Commission Journal on Quality and Patient Safety*. 2010;36(5):203-8.
10. Buhr GT, White HK. Quality Improvement Initiative for Chronic Pain Assessment and Management in the Nursing Home: A Pilot Study. *Journal of the American Medical Directors Association*. [doi: 10.1016/j.jamda.2005.11.002]. 2006;7(4):246-53.
11. Campbell S, MacDonald M, Carr B, Anderson D, MacKinley R, Cairns S. Bridging the gap between primary and secondary care: use of a clinical pathway for the investigation and management of deep vein thrombosis. *Journal of health services research & policy*. 2008;13(suppl 1):15-9.
12. Caswell DR, Williams JP, Vallejo M, Zaroda T, McNair N, Keckeisen M, et al. Improving pain management in critical care. *The Joint Commission journal on quality improvement*. 1996;22(10):702-12.
13. Chen M, Deng, Jin-Hua, Zhou, Fu-De, Wang M, et al. Improving the management of anemia in hemodialysis patients by implementing the continuous quality improvement program. Basel, SUISSE: Karger; 2006.
14. Christie P, Robinson H. Using a communication framework at handover to boost patient outcomes. *Nurs Times*. 2009 Dec 1-7;105(47):13-5.
15. Curran E, Bunyan D. Using a PDSA cycle of improvement to increase preparedness for, and management of, norovirus in NHS Scotland. *Journal of Hospital Infection*. 2012.
16. Dobrzanska L, Young L, Patterson C. Piloting stroke rehabilitation in a community hospital. *Nursing times*. 2006;102(43):30-1.
17. Dover N. Caring for patients in the right place at the right time. *Emergency nurse: the journal of the RCN Accident and Emergency Nursing Association*. 2012;20(3):30.
18. Dunn SL, Shattuck SR, Baird L, Mau J, Bakker D. Developing a nursing model of care? Try focus groups. *Nursing Management*. 2011;42(8):24-6.
19. Eckhart J, Gilbert P. Improved Coumadin therapy using a continuous quality improvement process. *Clin Lab Manage Rev*. 1996 Mar-Apr;10(2):153-6.
20. Eisenberg P, Painter JD. Intravascular therapy process improvement in a multihospital system: don't get stuck with substandard care. *Clin Nurse Spec*. 2002 Jul;16(4):182-6.
21. Esmail R, Kirby A, Inkson T, Boiteau P. Quality improvement in the ICU. A Canadian perspective. *Journal of critical care*. 2005;20(1):74.
22. Feehery PA, Allen S, Bey J. Flushing 101: using a FOCUS-PDCA quality improvement model to reduce catheter occlusions with standardized protocols. *Journal of Vascular Access Devices*. 2003;8(2):38-45.
23. Fernandes S, Benjamin EE, Edwards G. Using evidence to reduce the rate of episiotomy in a Dubai hospital. *Evidence-based Midwifery*. 2009;7(2):60.
24. Flynt G, Caraway C. Using OASIS data to improve skin care. *Home Healthc Nurse*. 2002 Apr;20(4):263-6.
25. Gillaspie M. Better Pain Management After Total Joint Replacement Surgery: A Quality Improvement Approach. *Orthopaedic Nursing*. 2010;29(1):20-4 10.1097/NOR.0b013e3181c8cd32.
26. Gordon DB, Jones HD, Goshman LM, Foley DK, Bland SE. A Quality Improvement Approach to Reducing Use of Meperidine. *Joint Commission Journal on Quality and Patient Safety*. 2000;26(12):686-99.
27. Gordon DB, Rees SM, McCausland MP, Pellino TA, Sanford-Ring S, Smith-Helmenstine J, et al. Improving Reassessment and Documentation of Pain Management. *Joint Commission Journal on Quality and Patient Safety*. 2008;34(9):509-17.



28. Gray J, Eden G, Williams M. Developing the public health role of a front line clinical service: integrating stop smoking advice into routine podiatry services. *Journal of Public Health*. 2007 June 1, 2007;29(2):118-22.
29. Hallett N, Hewison A. How to address the physical needs of clients in a mental health setting. *Nursing management* (Harrow, London, England: 1994). 2012;18(10):30.
30. Hoskins EJ, Sayger SA, Westman JS. Quality Improvement in Patient Distribution at a Major University Student Health Center. *Journal of American College Health*. [doi: 10.1080/07448480209603449]. 2002 2002/05/01;50(6):303-8.
31. Isouard G. A quality management intervention to improve clinical laboratory use in acute myocardial infarction. *The Medical journal of Australia*. 1999;170(1):11-4.
32. Johnson P, Raterink G. Implementation of a diabetes clinic-in-a-clinic project in a family practice setting: using the plan, do, study, act model. *J Clin Nurs*. 2009;18(14):2096-103.
33. Koll BS, Straub TA, Jalon HS, Block R, Heller KS, Ruiz RE. The CLABs collaborative: a regionwide effort to improve the quality of care in hospitals. *Joint Commission Journal on Quality and Patient Safety*. 2008;34(12):713-23.
34. Leone AF, Standoli F, Hirth V. Implementing a Pain Management Program in a Long-Term Care Facility Using a Quality Improvement Approach. *Journal of the American Medical Directors Association*. 2009;10(1):67-73.
35. Lynch-Jordan AM, Kashikar-Zuck S, Crosby LE, Lopez WL, Smolyansky BH, Parkins IS, et al. Applying Quality Improvement Methods to Implement a Measurement System for Chronic Pain-Related Disability. *Journal of Pediatric Psychology*. 2010 January 1, 2010;35(1):32-41.
36. Manfredi SR, Canziani ME, Draibe SA, Dalboni MA, Andreolli MC, Watanabe R, et al. A model for improving quality in nephrology settings. *Nephrol Nurs J*. 2003 Jun;30(3):295-9.
37. Marang-van de Mheen P, Stadlander M, Kievit J. Adverse outcomes in surgical patients: implementation of a nationwide reporting system. *Quality and Safety in Health Care*. 2006;15(5):320-4.
38. Marcellus L, Harrison A, MacKinnon K. Quality Improvement for Neonatal Nurses, Part II: Using a PDSA Quality Improvement Cycle Approach to Implement an Oral Feeding Progression Guideline for Premature Infants. *Neonatal Network: The Journal of Neonatal Nursing*. 2012;31(4):215-22.
39. McPharlin M, Shepard AD, Kiell CS, Nypaver TJ. FOCUS-PDCA: A Quality Improvement Tool to Improve Efficiency in the Vascular Laboratory. *Journal of Vascular Technology*. 1993;17(5):243-6.
40. Meehan CD, Silvestri A, Street ED. Improving blood glucose monitoring in a hospital setting using the PDCA approach. *Journal of Nursing Care Quality*. 1993;7(4):56-63.
41. Miano B, Wood W. Implementation of the i.v. push method of antibiotic administration using the FOCUS/PDCA approach. *Home Healthc Nurse*. 1998 Dec;16(12):831-7.
42. Miller LJ, Clark GB. Quality improvement in the cutaneous micrographic surgery laboratory. *Clin Lab Manage Rev*. 1994 Nov-Dec;8(6):574-6, 8-86, 88-92.
43. Moran S. Improving palliative care. *Nurs Manag* (Harrow). 2009 May;16(2):14-7.
44. Nakayama DK, Bushey TN, Hubbard I, Cole D, Brown A, Grant TM, et al. Using a Plan-Do-Study-Act Cycle to Introduce a New OR Service Line. *AORN journal*. 2010;92(3):335-43.

45. Nayeri ND, Zargar MT. An investigation into the effects of quality improvement method on patients' satisfaction: a semi experimental research in Iran. *Acta Medica Iranica*. 2011;49(1).
46. New SW, Gutierrez L. Quality improvement in the ambulatory surgical setting. *Nurs Clin North Am*. 1997 Jun;32(2):477-88.
47. Nicotra D, Ulrich C. Process improvement plan for the reduction of nosocomial pneumonia in patients on ventilators. *Journal of Nursing Care Quality*. 1996;10(4):18.
48. Olenginski TP, Newman ED, Hummel JL, Hummer M. Development and evaluation of a vertebral fracture assessment program using IVA and its integration with mobile DXA. *Journal of Clinical Densitometry*. 2006;9(1):72-7.
49. Oylar J, Vinci L, Johnson J, Arora V. Teaching Internal Medicine Residents to Sustain Their Improvement Through the Quality Assessment and Improvement Curriculum. *J Gen Intern Med*. 2011;26(2):221-5.
50. Pace NM, Long JB, Elerding S, Lim H, Kelly M, Reed J, et al. Performance Model Anchors Successful Nutrition Support Protocol. *Nutrition in Clinical Practice*. 1997 December 1, 1997;12(6):274-9.
51. Porter C, Greenfield C, Larson A, Gilles M. Improving GP diabetes management--A PDSA audit cycle in Western Australia. *Aust Fam Physician*. 2009;38(11):939.
52. Pronovost PJ, Morlock L, Davis RO, Cunningham T, Paine L, Scheulen J. Using Online and Offline Change Models to Improve ICU Access and Revenues. *Joint Commission Journal on Quality and Patient Safety*. 2000;26(1):5-17.
53. Provance L, Alvis D, Silfen E. Quality improvement and public health-tetanus immunization in the emergency department. *American Journal of Medical Quality*. 1994;9(4):165-71.
54. Reid D, Leyland J, Gill L. Does client self-booking reduce 'Did not attend' (DNAs) in a counselling service? *Counselling and Psychotherapy Research*. [doi: 10.1080/14733140500510275]. 2005 2005/12/01;5(4):291-4.
55. Reid D, Glascott G, Woods D. Improving referral information in community mental health. *Nurs Times*. 2005 Oct 18-24;101(42):34-5.
56. Robarts S, Kennedy D, MacLeod AM, Findlay H, Gollish J. A framework for the development and implementation of an advanced practice role for physiotherapists that improves access and quality of care for patients. *Healthcare quarterly (Toronto, Ont)*. 2008;11(2):67.
57. Sanchez I. Implementation of a Diabetic Visual Foot Assessment in a Primary Care Setting. *The Internet Journal of Advanced Nursing Practice*. 2009;10(2).
58. Saxena S, Ramer L, Shulman IA. A comprehensive assessment program to improve blood administering practices using the FOCUS-PDCA model. *Transfusion*. 2004;44(9):1350-6.
59. Simon NV, Heaps KP, Chodroff CH. Improving the processes of care and outcomes in obstetrics/gynecology. *The Joint Commission journal on quality improvement*. 1997;23(9):485-97.
60. Sorokin R, Gottlieb JE. Enhancing Patient Safety During Feeding-Tube Insertion: A Review of More Than 2000 Insertions. *Journal of Parenteral and Enteral Nutrition*. 2006 SEPTEMBER-OCTOBER 2006;30(5):440-5.
61. Stadt J, Molare E. Best practices: that improved patient outcomes and agency operational performance. *Home Healthc Nurse*. 2005 Sep;23(9):587-93.
62. Stevens DP, Bowen JL, Johnson JK, Woods DM, Provost LP, Holman HR, et al. A multi-institutional quality improvement initiative to transform education for chronic illness care in resident continuity practices. *J Gen Intern Med*. 2010;25:574-80.

63. Sumrall D, Douglas J. Achieving appropriate prophylactic antibiotic administration while simultaneously implementing an automated anesthesia record. *Ochsner J*. 2011 Spring;11(1):34-6.
64. Tea C, Ellison M, Feghali F. Proactive patient rounding to increase customer service and satisfaction on an orthopaedic unit. *Orthopaedic Nursing*. 2008;27(4):233-40.
65. Thakkar K, Gilchrist M, Dickinson E, Benn J, Franklin BD, Jacklin A, et al. A quality improvement programme to increase compliance with an anti-infective prescribing policy. *Journal of Antimicrobial Chemotherapy*. 2011;66(8):1916-20.
66. Tomolo AM, Lawrence RH, Aron DC. A case study of translating ACGME practice-based learning and improvement requirements into reality: systems quality improvement projects as the key component to a comprehensive curriculum. *Postgraduate Medical Journal*. 2009 October 1, 2009;85(1008):530-7.
67. Torkki PM, Alho AI, Peltokorpi AV, Torkki MI, Kallio PE. Managing urgent surgery as a process: Case study of a trauma center. *International Journal of Technology Assessment in Health Care*. 2006;22(02):255-60.
68. van Tiel FH, Elenbaas TWO, Voskuilen BMAM, Herczeg J, Verheggen FW, Mochtar B, et al. Plan-do-study-act cycles as an instrument for improvement of compliance with infection control measures in care of patients after cardiothoracic surgery. *Journal of Hospital Infection*. [doi: 10.1016/j.jhin.2005.05.016]. 2006;62(1):64-70.
69. Varkey P, Sathananthan A, Scheifer A, Bhagra S, Fujiyoshi A, Tom A, et al. Using quality-improvement techniques to enhance patient education and counselling of diagnosis and management. *Quality in Primary Care*. 2009;17(3):205-13.
70. Wheatland B, Porter C, Gilles M, Greenfield C, Larson A. Initiating a PDSA cycle-Improving management of diabetes in rural WA. *Aust Fam Physician*. 2006;35(8):650.
71. Wojciechowski E, Cichowski K. A Case Review: Designing a New Patient Education System. *The Internet Journal of Advanced Nursing Practice*. 2007;8(2).
72. Wolfenden J, Dunn A, Holmes A, Davies C, Buchan J. Track and trigger system for use in community hospitals. *Nursing standard*. 2010;24(45):35-9.
73. Zack J. Zeroing in on zero tolerance for central line-associated bacteremia. *Am J Infect Control*. 2008;36(10):S176. e1.
