# Supplementary material for: Systematic review of the application of the plan–do–study–act method to improve quality in healthcare
Source: PubMed Central journal article supplement — BMJ Qual Saf. 2013 Aug 23;23(4):290–8. doi: 10.1136/bmjqs-2013-001862 (PMC3963536; doi:10.1136/bmjqs-2013-001862), 2013-08-23
Supplement: bmjqs-2013-001862-s2.pdf [file bmjqs-2013-001862-s2.pdf]

## Appendix B: Studies identified in search that described PDSA method in sufficient detail to be included for full analysis

| First Author                                           | Cycle(s) referred to as PDSAs or PDCAs?             | Iterative Cycles                   |                                                                                |                               | Prediction-based test of change                                              | Small-scale testing                            |                     |     |                          |                                                                   |     |          | Data over time  |                            |                   |                              |
|--------------------------------------------------------|-----------------------------------------------------|------------------------------------|--------------------------------------------------------------------------------|-------------------------------|------------------------------------------------------------------------------|------------------------------------------------|---------------------|-----|--------------------------|-------------------------------------------------------------------|-----|----------|-----------------|----------------------------|-------------------|------------------------------|
|                                                        |                                                     | Iterative nature of cycles         | Number of cycles / chains of cycles                                            | Content of final "act" stage  |                                                                              | Prediction-based test of change categorisation | Sample              |     | Complexity               | Duration                                                          |     |          | Length of cycle | Regular (R) / isolated (I) | Use of statistics | Data Time Interval (months)  |
| Total sample size post PDSA cycle initiation per chain | Incremental scale over cycles of an iterative chain | Several tests of change in a cycle | Total Length of PDSA cycle conduct (start of first cycle to end of last cycle) | Length of individual cycles   | Deduced average duration per cycle (Total PDSA use duration/ number of PDSA) |                                                |                     |     |                          |                                                                   |     |          |                 |                            |                   |                              |
| Beger (1)                                              | PDCA                                                | Single isolated cycle              | 1                                                                              | 2 Further changes implemented | Testing change - with explicit prediction articulated in plan                | 33                                             | N/A                 | No  | 30                       | Not Stated                                                        | 30  | 30       | I               | None                       | Before and after  | Quantitative and Qualitative |
| Bittle(2)                                              | PDSA                                                | Iterative chain                    | 3                                                                              | 1 Not referred to             | Testing change                                                               | Not Stated                                     | No sample size data | Yes | 45                       | Cycles 1: 4, Cycle 2: 3, Cycle 3: 12                              | N/A | 4; 3; 12 | R               | p value                    | 12                | Quantitative                 |
| Boyd(3)                                                | PDSA                                                | Iterative chain                    | 7                                                                              | 5 New PDSA scheduled          | Testing change                                                               | 100                                            | Not incremental     | No  | 7                        | 1                                                                 | N/A | 1        | R               | p value                    | Weekly            | Quantitative                 |
| Brown(4)                                               | PDSA                                                | Single isolated cycle              | 1                                                                              | 5 New PDSA scheduled          | Testing change                                                               | Not Stated                                     | N/A                 | Yes | 1                        | 1                                                                 | N/A | 1        | N               | None                       | N/A               | Qualitative                  |
| Buckley(5)                                             | PDSA                                                | Multiple Iterative chains          | Chain 1: 6, Chain 2: unclear                                                   | 2 Further changes implemented | Testing change - with explicit prediction articulated in plan                | Not Stated                                     | No sample size data | No  | Chain 1: 45, Chain 2: 36 | Not Stated                                                        | 7.5 | 7.5      | R               | p value                    | 3                 | Quantitative                 |
| Buhr(6)                                                | PDSA                                                | Multiple isolated cycles           | 4                                                                              | 3 Changes made permanent      | Testing change                                                               | Cycle 1: 66, Cycle 2, 3, 4: Not stated         | N/A                 | No  | 16                       | Cycle 1: 3, Cycle 2: Not stated, Cycle 3: 11, Cycle 4: Not stated | N/A | 3; 11    | I               | none                       | Before and after  | Quantitative                 |

|               |      |                       |   |                               |                                                     |            |                     |     |            |            |            |            |   |         |                         |                                |
|---------------|------|-----------------------|---|-------------------------------|-----------------------------------------------------|------------|---------------------|-----|------------|------------|------------|------------|---|---------|-------------------------|--------------------------------|
| Caswell(7)    | PDCA | Single isolated cycle | 1 | 2 Further changes implemented | Testing change                                      | 46         | N/A                 | Yes | 9          | 9          | N/A        | 9          | I | None    | Before and after        | Quantitative                   |
| Chen(8)       | PDCA | Single isolated cycle | 1 | 3 Changes made permanent      | Testing change                                      | 90         | N/A                 | Yes | 20         | Not Stated | 20         | 20         | I | p value | Before and after        | Quantitative                   |
| Christie(9)   | PDSA | Single isolated cycle | 1 | 2 Further changes implemented | Testing change                                      | Not Stated | N/A                 | No  | Not Stated | Not Stated | Not Stated | Not Stated | I | None    | Before and after        | Quantitative                   |
| Curran(10)    | PDSA | Single isolated cycle | 1 | 5 New PDSA scheduled          | Testing change                                      | 307        | N/A                 | Yes | 12         | 12         | N/A        | 12         | R | None    | Weekly                  | Quantitative and Qualitative   |
| Dover(11)     | PDSA | Iterative chain       | 4 | 3 Changes made permanent      | Collecting data in first followed by testing change | Not Stated | No sample size data | No  | 12         | Not Stated | 3          | 3          | I | None    | Before and after        | Quantitative and Qualitative   |
| Dunn(12)      | PDSA | Single isolated cycle | 1 | 2 Further changes implemented | Collecting data                                     | 332        | N/A                 | No  | 2          | 2          | N/A        | 2          | N | None    | N/A                     | Qualitative                    |
| Eckhart(13)   | PDCA | Single isolated cycle | 1 | 4 Further changes suggested   | Testing change                                      | 43         | N/A                 | No  | 18         | 18         | N/A        | 18         | I | None    | Irregular 4 data points | Quantitative                   |
| Eisenberg(14) | PDCA | Single isolated cycle | 1 | 2 Further changes implemented | Testing change                                      | 1100       | N/A                 | Yes | 18         | Not Stated | 18         | 18         | N | None    | N/A                     | Quantitative but not presented |
| Fernandes(15) | PDCA | Single isolated cycle | 1 | 3 Changes made permanent      | Testing change                                      | 70         | N/A                 | No  | 13         | Not Stated | 13         | 13         | R | None    | 1                       | Quantitative                   |
| Flynt(16)     | PDCA | Single isolated cycle | 1 | 4 Further changes suggested   | Testing change                                      | Not Stated | N/A                 | Yes | Not Stated | Not Stated | Not Stated | Not Stated | N | None    | N/A                     | Quantitative but not presented |

|                  |      |                           |                                         |                               |                                                     |                                                   |                            |     |                                |            |              |              |   |         |                      |              |
|------------------|------|---------------------------|-----------------------------------------|-------------------------------|-----------------------------------------------------|---------------------------------------------------|----------------------------|-----|--------------------------------|------------|--------------|--------------|---|---------|----------------------|--------------|
| Gillaspie(17)    | PDSA | Iterative chain           | 3                                       | 0 - Unclear                   | Testing change                                      | Not Stated                                        | No sample size data        | No  | 0.0333333333                   | Not Stated | 0.0111111111 | 0.0111111111 | N | None    | N/A                  | Qualitative  |
| Gordon(18)       | PDCA | Single isolated cycle     | 1                                       | 2 Further changes implemented | Testing change                                      | Not Stated                                        | N/A                        | Yes | 60                             | 60         | N/A          | 60           | I | None    | Irregular - 5 points | Quantitative |
| Gordon(19)       | PDCA | Single isolated cycle     | 1                                       | 2 Further changes implemented | Testing change                                      | Not Stated                                        | N/A                        | Yes | 24                             | Not Stated | 24           | 24           | R | None    | Daily                | Quantitative |
| Hallett(20)      | PDSA | Single isolated cycle     | 1                                       | 2 Further changes implemented | Testing change                                      | 7                                                 | N/A                        | No  | 3                              | 3          | N/A          | 3            | A | None    | N/A                  | Quantitative |
| Hoskins(21)      | PDCA | Multiple isolated cycles  | 2                                       | 3 Changes made permanent      | Testing change                                      | Not Stated                                        | N/A                        | Yes | Cycle 1:6, Cycle 2: Not Stated | Not Stated | 6            | 6            | R | p value | 1                    | Quantitative |
| Isouard(22)      | PDCA | Single isolated cycle     | 1                                       | 2 Further changes implemented | Testing change                                      | Not Stated                                        | N/A                        | Yes | 12                             | Not Stated | 12           | 12           | R | p value | 2                    | Quantitative |
| Johnson(23)      | PDSA | Multiple isolated cycles  | 5                                       | 4 Further changes suggested   | Testing change                                      | Not Stated                                        | N/A                        | Yes | Not Stated                     | Not Stated | N/A          | Not Stated   | A | None    | N/A                  | Quantitative |
| Leone(24)        | PDSA | Single isolated cycle     | 1                                       | 5 New PDSA scheduled          | Testing change                                      | 40                                                | N/A                        | Yes | 2                              | 2          | N/A          | 2            | A | None    | N/A                  | Quantitative |
| Lynch-Jordan(25) | PDSA | Multiple Iterative chains | 4 chains of multiple cycles(not stated) | 5 New PDSA scheduled          | Testing change                                      | Chain 1:5, Chain 2:34, Chain 3:5, Chain 4:unclear | Incremental of same sample | Yes | 6                              | Not Stated | Not Stated   | Not Stated   | R | None    | Weekly               | Quantitative |
| Manfredi(26)     | PDCA | Iterative chain           | 3                                       | 5 New PDSA scheduled          | Collecting data in first followed by testing change | 29                                                | Not incremental            | Yes | 6                              | Not Stated | 2            | 2            | I | None    | Per PDSA cycle       | Quantitative |

|               |      |                          |   |                               |                                                               |                                       |                 |     |            |                                             |            |            |   |         |                  |                              |
|---------------|------|--------------------------|---|-------------------------------|---------------------------------------------------------------|---------------------------------------|-----------------|-----|------------|---------------------------------------------|------------|------------|---|---------|------------------|------------------------------|
| Marcellus(27) | PDSA | Iterative chain          | 3 | 0 - Unclear                   | Collecting data in first followed by testing change           | 178                                   | Not incremental | Yes | 32         | Cycle 1: 8, Cycle 2: 7, Cycle 3: 16         | N/A        | 8; 7; 16   | I | None    | Per PDSA cycle   | Quantitative                 |
| McPharlin(28) | PDCA | Single isolated cycle    | 1 | 2 Further changes implemented | Testing change                                                | 68                                    | N/A             | No  | 14         | 5                                           | N/A        | 5          | I | None    | Before and after | Quantitative                 |
| Meehan(29)    | PDCA | Single isolated cycle    | 1 | 2 Further changes implemented | Testing change - with explicit prediction articulated in plan | 62                                    | N/A             | No  | 0.5        | 0.5                                         | N/A        | 0.5        | N | None    | N/A              | Qualitative                  |
| Miano(30)     | PDCA | Single isolated cycle    | 1 | 2 Further changes implemented | Testing change                                                | 31                                    | N/A             | No  | 6          | 6                                           | N/A        | 6          | A | None    | N/A              | Quantitative                 |
| Miller(31)    | PDCA | Iterative chain          | 3 | 1 Not referred to             | Collecting data in first followed by testing change           | 75                                    | Not incremental | No  | Not Stated | Cycle 1: 6, Cycle 2: 6, Cycle 3: Not Stated | N/A        | 6; 6       | R | None    | Per data item    | Quantitative                 |
| Moran(32)     | PDSA | Single isolated cycle    | 1 | 4 Further changes suggested   | Testing change                                                | Not Stated                            | N/A             | Yes | Not Stated | Not Stated                                  | Not Stated | Not Stated | N | None    | N/A              | Qualitative                  |
| Nayeri(33)    | PDCA | Single isolated cycle    | 1 | 3 Changes made permanent      | Testing change                                                | 44                                    | N/A             | No  | Not Stated | Not Stated                                  | Not Stated | Not Stated | I | p value | Before and after | Quantitative                 |
| New(34)       | PDCA | Single isolated cycle    | 1 | 3 Changes made permanent      | Testing change                                                | Not Stated                            | N/A             | No  | 1          | 1                                           | N/A        | 1          | N | None    | N/A              | Qualitative                  |
| Pace(35)      | PDCA | Iterative chain          | 3 | 3 Changes made permanent      | Collecting data in first followed by testing change           | Sample changed during iterative chain | Change sample   | Yes | 48         | Not Stated                                  | 16         | 16         | R | None    | 3                | Quantitative                 |
| Pronovost(36) | PDSA | Multiple isolated cycles | 3 | 3 Changes made permanent      | Testing change                                                | Not Stated                            | N/A             | No  | Not Stated | Cycle 1: 3, Cycle 2, 3: Not Stated          | N/A        | 3;3        | R | None    | 1                | Quantitative and Qualitative |

|               |      |                           |                                         |                               |                 |            |                                           |     |            |            |            |            |   |         |                  |                              |
|---------------|------|---------------------------|-----------------------------------------|-------------------------------|-----------------|------------|-------------------------------------------|-----|------------|------------|------------|------------|---|---------|------------------|------------------------------|
| Reid(37)      | PDSA | Single isolated cycle     | 1                                       | 4 Further changes suggested   | Collecting data | 50         | N/A                                       | No  | 1          | Not Stated | 1          | 1          | A | None    | N/A              | Quantitative                 |
| Robarts(38)   | PDSA | Multiple Iterative chains | 2 chains of multiple cycles(not stated) | 3 Changes made permanent      | Testing change  | Not Stated | No sample size data                       | No  | Not Stated | Not Stated | N/A        | Not Stated | A | p value | N/A              | Quantitative and Qualitative |
| Sanchez(39)   | PDCA | Single isolated cycle     | 1                                       | 4 Further changes suggested   | Testing change  | 52         | N/A                                       | No  | 0.5        | 0.5        | N/A        | 0.5        | A | None    | N/A              | Quantitative                 |
| Simon(40)     | PDCA | Single isolated cycle     | 1                                       | 3 Changes made permanent      | Testing change  | 1094       | N/A                                       | No  | 24         | Not Stated | 24         | 24         | I | p value | Before and after | Quantitative                 |
| Sorokin(41)   | PDSA | Single isolated cycle     | 1                                       | 2 Further changes implemented | Testing change  | 2079       | N/A                                       | Yes | 20         | Not Stated | 20         | 20         | R | None    | 3                | Quantitative                 |
| Stadt(42)     | PDSA | Iterative chain           | Multiple (not stated)                   | 0 - Unclear                   | Testing change  | Not Stated | Individual cycle sample size not reported | Yes | 48         | Not Stated | Not Stated | Not Stated | R | None    | 3                | Quantitative and Qualitative |
| Sumrall(43)   | PDSA | Single isolated cycle     | 1                                       | 4 Further changes suggested   | Testing change  | Not Stated | N/A                                       | Yes | 18         | Not Stated | 18         | 18         | R | None    | 3                | Quantitative                 |
| Torkki(44)    | PDCA | Single isolated cycle     | 1                                       | 2 Further changes implemented | Testing change  | 923        | N/A                                       | Yes | 12         | Not Stated | 12         | 12         | R | p value | 12               | Quantitative                 |
| Varkey(45)    | PDSA | Iterative chain           | 5                                       | 0 - Unclear                   | Testing change  | 68         | Incremental of same sample                | No  | 0.75       | Not Stated | 0.15       | 0.15       | I | p value | Before and after | Quantitative                 |
| Wheatland(46) | PDSA | Single isolated cycle     | 1                                       | 2 Further changes implemented | Collecting data | 253        | N/A                                       | No  | Not Stated | Not Stated | N/A        | Not Stated | A | None    | N/A              | Quantitative                 |

|                   |      |                           |                                         |                      |       |            |                 |    |    |            |            |            |   |      |                  |                              |
|-------------------|------|---------------------------|-----------------------------------------|----------------------|-------|------------|-----------------|----|----|------------|------------|------------|---|------|------------------|------------------------------|
| Wojciechowski(47) | PDSA | Multiple Iterative chains | 4 chains of multiple cycles(not stated) | 5 New PDSA scheduled | Mixed | Not Stated | Not incremental | No | 48 | Not Stated | Not Stated | Not Stated | 1 | None | Before and after | Quantitative and Qualitative |
|-------------------|------|---------------------------|-----------------------------------------|----------------------|-------|------------|-----------------|----|----|------------|------------|------------|---|------|------------------|------------------------------|

1. Beger D, Messenger F, Roth S. Self-Administered Medication Packet for Patients Experiencing a Vaginal Birth. *Journal of Nursing Care Quality*. 1999;13(4):47-59.
2. Bittle MJ, Charache P, Wassilchak DM. Performance Improvement: Registration-Associated Patient Misidentification in an Academic Medical Center: Causes and Corrections. *Joint Commission Journal on Quality and Patient Safety*. 2007;33(1):25-33.
3. Boyd S, Aggarwal I, Davey P, Logan M, Nathwani D. Peripheral intravenous catheters: the road to quality improvement and safer patient care. *Journal of Hospital Infection*. [doi: 10.1016/j.jhin.2010.09.011]. 2011;77(1):37-41.
4. Brown A. Redesigning patient services. *Nursing Management - UK*. 2006;13(2):26-30.
5. Buckley JD, Joyce B, Garcia AJ, Jordan J, Scher E. Linking Residency Training Effectiveness to Clinical Outcomes: A Quality Improvement Approach. *Joint Commission Journal on Quality and Patient Safety*. 2010;36(5):203-8.
6. Buhr GT, White HK. Quality Improvement Initiative for Chronic Pain Assessment and Management in the Nursing Home: A Pilot Study. *Journal of the American Medical Directors Association*. [doi: 10.1016/j.jamda.2005.11.002]. 2006;7(4):246-53.
7. Caswell DR, Williams JP, Vallejo M, Zaroda T, McNair N, Keckeisen M, et al. Improving pain management in critical care. *The Joint Commission journal on quality improvement*. 1996;22(10):702-12.
8. Chen M, Deng, Jin-Hua, Zhou, Fu-De, Wang M, et al. Improving the management of anemia in hemodialysis patients by implementing the continuous quality improvement program. Basel, SUISE: Karger; 2006.
9. Christie P, Robinson H. Using a communication framework at handover to boost patient outcomes. *Nurs Times*. 2009 Dec 1-7;105(47):13-5.
10. Curran E, Bunyan D. Using a PDSA cycle of improvement to increase preparedness for, and management of, norovirus in NHS Scotland. *Journal of Hospital Infection*. 2012.
11. Dover N. Caring for patients in the right place at the right time. *Emergency nurse: the journal of the RCN Accident and Emergency Nursing Association*. 2012;20(3):30.
12. Dunn SL, Shattuck SR, Baird L, Mau J, Bakker D. Developing a nursing model of care? Try focus groups. *Nursing Management*. 2011;42(8):24-6.
13. Eckhart J, Gilbert P. Improved Coumadin therapy using a continuous quality improvement process. *Clin Lab Manage Rev*. 1996 Mar-Apr;10(2):153-6.
14. Eisenberg P, Painter JD. Intravascular therapy process improvement in a multihospital system: don't get stuck with substandard care. *Clin Nurse Spec*. 2002 Jul;16(4):182-6.

15. Fernandes S, Benjamin EE, Edwards G. Using evidence to reduce the rate of episiotomy in a Dubai hospital. *Evidence-based Midwifery*. 2009;7(2):60.
16. Flynt G, Caraway C. Using OASIS data to improve skin care. *Home Healthc Nurse*. 2002 Apr;20(4):263-6.
17. Gillaspie M. Better Pain Management After Total Joint Replacement Surgery: A Quality Improvement Approach. *Orthopaedic Nursing*. 2010;29(1):20-4 10.1097/NOR.0b013e3181c8cd32.
18. Gordon DB, Jones HD, Goshman LM, Foley DK, Bland SE. A Quality Improvement Approach to Reducing Use of Meperidine. *Joint Commission Journal on Quality and Patient Safety*. 2000;26(12):686-99.
19. Gordon DB, Rees SM, McCausland MP, Pellino TA, Sanford-Ring S, Smith-Helmenstine J, et al. Improving Reassessment and Documentation of Pain Management. *Joint Commission Journal on Quality and Patient Safety*. 2008;34(9):509-17.
20. Hallett N, Hewison A. How to address the physical needs of clients in a mental health setting. *Nursing management (Harrow, London, England: 1994)*. 2012;18(10):30.
21. Hoskins EJ, Sayger SA, Westman JS. Quality Improvement in Patient Distribution at a Major University Student Health Center. *Journal of American College Health*. [doi: 10.1080/07448480209603449]. 2002 2002/05/01;50(6):303-8.
22. Isouard G. A quality management intervention to improve clinical laboratory use in acute myocardial infarction. *The Medical journal of Australia*. 1999;170(1):11-4.
23. Johnson P, Raterink G. Implementation of a diabetes clinic-in-a-clinic project in a family practice setting: using the plan, do, study, act model. *J Clin Nurs*. 2009;18(14):2096-103.
24. Leone AF, Standoli F, Hirth V. Implementing a Pain Management Program in a Long-Term Care Facility Using a Quality Improvement Approach. *Journal of the American Medical Directors Association*. 2009;10(1):67-73.
25. Lynch-Jordan AM, Kashikar-Zuck S, Crosby LE, Lopez WL, Smolyansky BH, Parkins IS, et al. Applying Quality Improvement Methods to Implement a Measurement System for Chronic Pain-Related Disability. *Journal of Pediatric Psychology*. 2010 January 1, 2010;35(1):32-41.
26. Manfredi SR, Canziani ME, Draibe SA, Dalboni MA, Andreolli MC, Watanabe R, et al. A model for improving quality in nephrology settings. *Nephrol Nurs J*. 2003 Jun;30(3):295-9.
27. Marcellus L, Harrison A, MacKinnon K. Quality Improvement for Neonatal Nurses, Part II: Using a PDSA Quality Improvement Cycle Approach to Implement an Oral Feeding Progression Guideline for Premature Infants. *Neonatal Network: The Journal of Neonatal Nursing*. 2012;31(4):215-22.
28. McPharlin M, Shepard AD, Kiell CS, Nypaver TJ. FOCUS-PDCA: A Quality Improvement Tool to Improve Efficiency in the Vascular Laboratory. *Journal of Vascular Technology*. 1993;17(5):243-6.
29. Meehan CD, Silvestri A, Street ED. Improving blood glucose monitoring in a hospital setting using the PDCA approach. *Journal of Nursing Care Quality*. 1993;7(4):56-63.
30. Miano B, Wood W. Implementation of the i.v. push method of antibiotic administration using the FOCUS/PDCA approach. *Home Healthc Nurse*. 1998 Dec;16(12):831-7.

31. Miller LJ, Clark GB. Quality improvement in the cutaneous micrographic surgery laboratory. *Clin Lab Manage Rev.* 1994 Nov-Dec;8(6):574-6, 8-86, 88-92.
32. Moran S. Improving palliative care. *Nurs Manag (Harrow).* 2009 May;16(2):14-7.
33. Nayeri ND, Zargar MT. An investigation into the effects of quality improvement method on patients' satisfaction: a semi experimental research in Iran. *Acta Medica Iranica.* 2011;49(1).
34. New SW, Gutierrez L. Quality improvement in the ambulatory surgical setting. *Nurs Clin North Am.* 1997 Jun;32(2):477-88.
35. Pace NM, Long JB, Elerding S, Lim H, Kelly M, Reed J, et al. Performance Model Anchors Successful Nutrition Support Protocol. *Nutrition in Clinical Practice.* 1997 December 1, 1997;12(6):274-9.
36. Pronovost PJ, Morlock L, Davis RO, Cunningham T, Paine L, Scheulen J. Using Online and Offline Change Models to Improve ICU Access and Revenues. *Joint Commission Journal on Quality and Patient Safety.* 2000;26(1):5-17.
37. Reid D, Glascott G, Woods D. Improving referral information in community mental health. *Nurs Times.* 2005 Oct 18-24;101(42):34-5.
38. Robarts S, Kennedy D, MacLeod AM, Findlay H, Gollish J. A framework for the development and implementation of an advanced practice role for physiotherapists that improves access and quality of care for patients. *Healthcare quarterly (Toronto, Ont).* 2008;11(2):67.
39. Sanchez I. Implementation of a Diabetic Visual Foot Assessment in a Primary Care Setting. *The Internet Journal of Advanced Nursing Practice.* 2009;10(2).
40. Simon NV, Heaps KP, Chodroff CH. Improving the processes of care and outcomes in obstetrics/gynecology. *The Joint Commission journal on quality improvement.* 1997;23(9):485-97.
41. Sorokin R, Gottlieb JE. Enhancing Patient Safety During Feeding-Tube Insertion: A Review of More Than 2000 Insertions. *Journal of Parenteral and Enteral Nutrition.* 2006 SEPTEMBER-OCTOBER 2006;30(5):440-5.
42. Stadt J, Molare E. Best practices: that improved patient outcomes and agency operational performance. *Home Healthc Nurse.* 2005 Sep;23(9):587-93.
43. Sumrall D, Douglas J. Achieving appropriate prophylactic antibiotic administration while simultaneously implementing an automated anesthesia record. *Ochsner J.* 2011 Spring;11(1):34-6.
44. Torkki PM, Alho AI, Peltokorpi AV, Torkki MI, Kallio PE. Managing urgent surgery as a process: Case study of a trauma center. *International Journal of Technology Assessment in Health Care.* 2006;22(02):255-60.
45. Varkey P, Sathananthan A, Scheifer A, Bhagra S, Fujiyoshi A, Tom A, et al. Using quality-improvement techniques to enhance patient education and counselling of diagnosis and management. *Quality in Primary Care.* 2009;17(3):205-13.
46. Wheatland B, Porter C, Gilles M, Greenfield C, Larson A. Initiating a PDSA cycle-Improving management of diabetes in rural WA. *Aust Fam Physician.* 2006;35(8):650.
47. Wojciechowski E, Cichowski K. A Case Review: Designing a New Patient Education System. *The Internet Journal of Advanced Nursing Practice.* 2007;8(2).
