# Supplementary material for: Systematic review of the application of the plan–do–study–act method to improve quality in healthcare
Source: PubMed Central journal article supplement — BMJ Qual Saf. 2013 Aug 23;23(4):290–8. doi: 10.1136/bmjqs-2013-001862 (PMC3963536; doi:10.1136/bmjqs-2013-001862), 2013-08-23

**Supplementary figure 1:** Prevalence of PDSA and PDCA terminology in initially included articles over time (n = 73 articles)

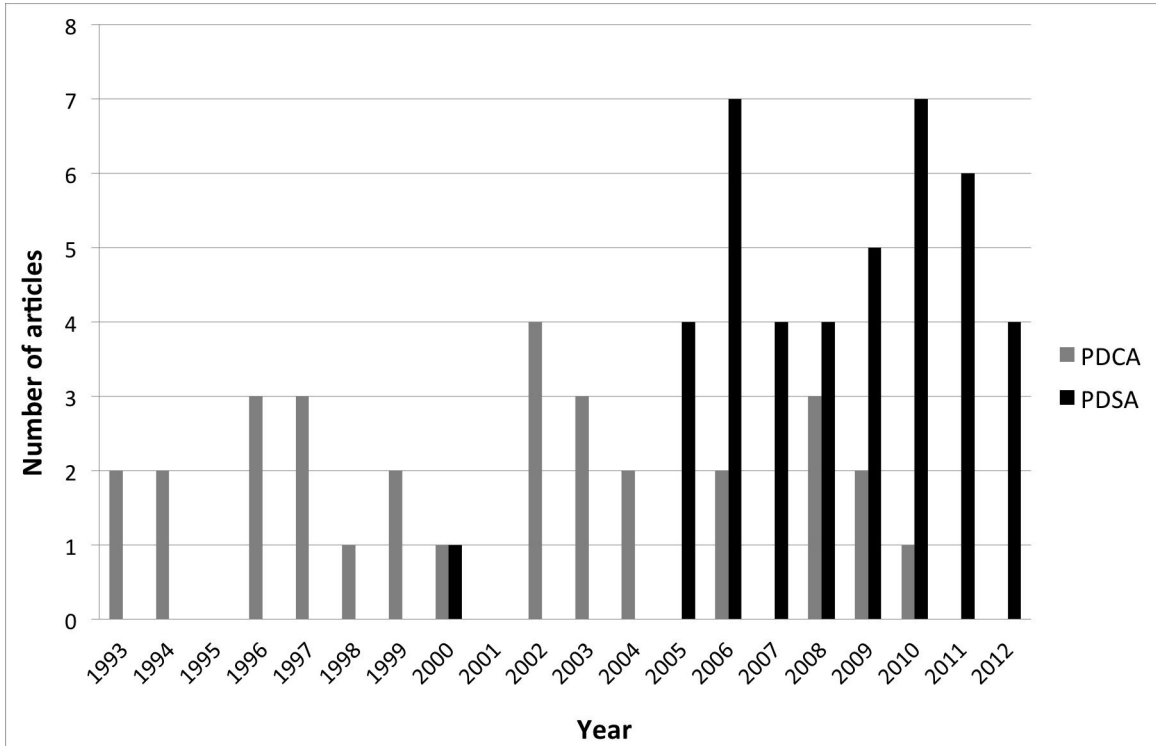

**Supplementary figure 2:** Reported durations of individual cycles of both iterative and isolated nature (n = 45 cycles).

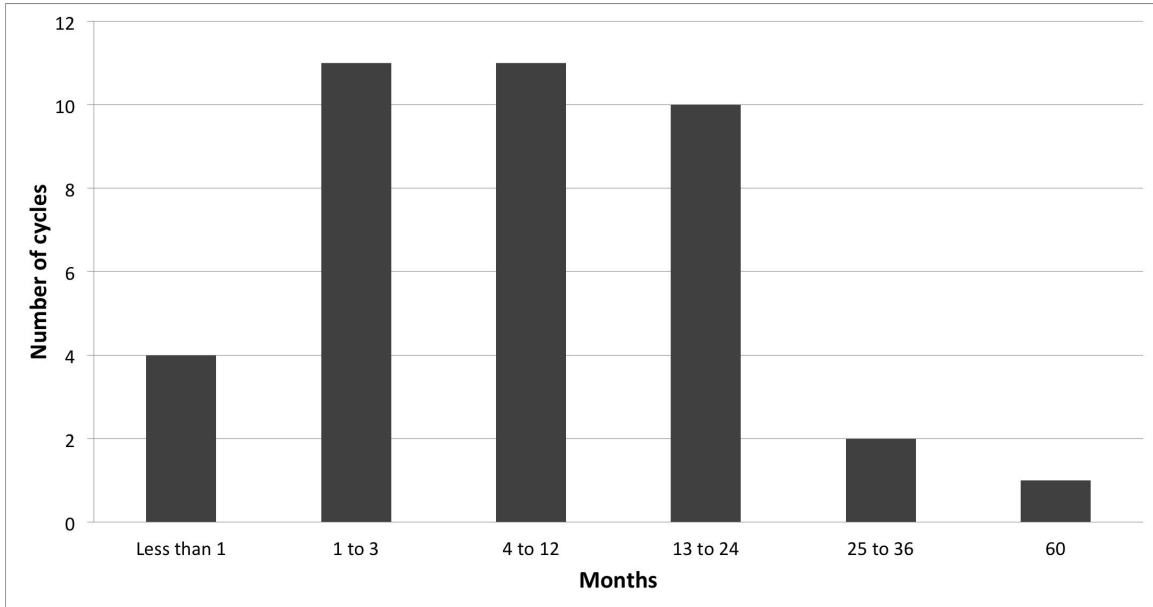

**Supplementary figure 3:** Regular quantitative data collection intervals (n = 15 articles)

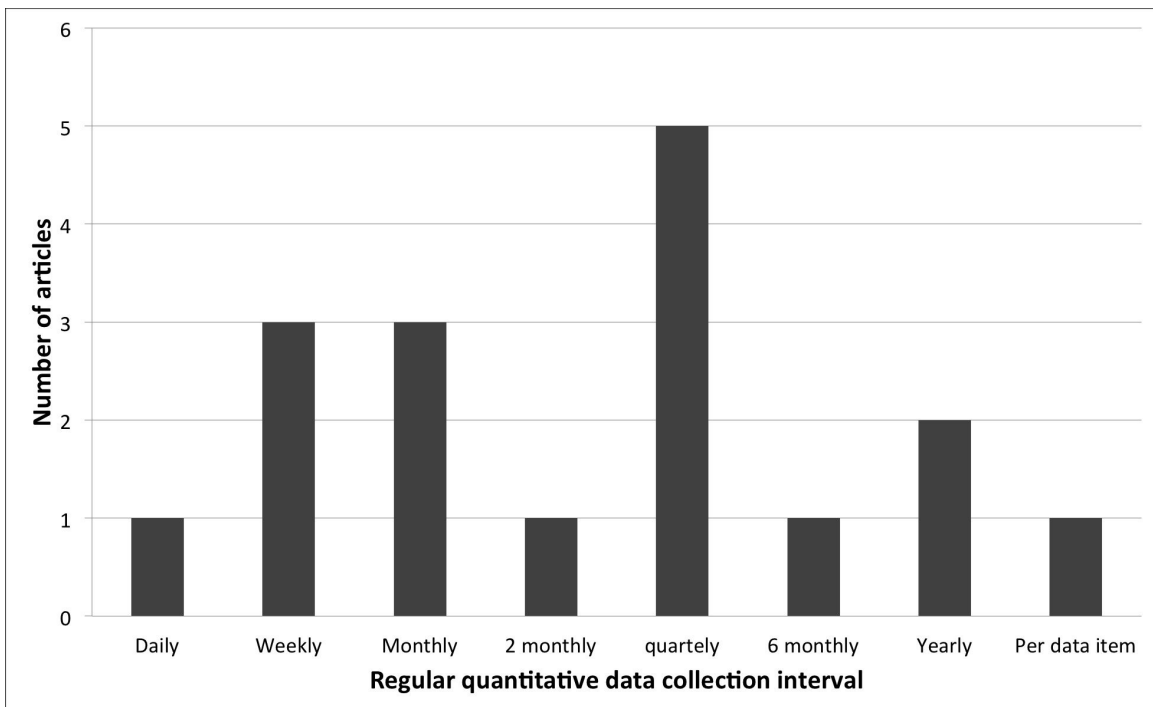

Supplement: bmjqs-2013-001862-s3.pdf [file bmjqs-2013-001862-s3.pdf]
